# Supplementary material
Source: Springer Nature journal article supplement (https://www.springermedizin.de/resource/supplementary/13054_2010_8656_MOESM2_ESM.pdf/9732494)

### HLA-DM $\alpha$

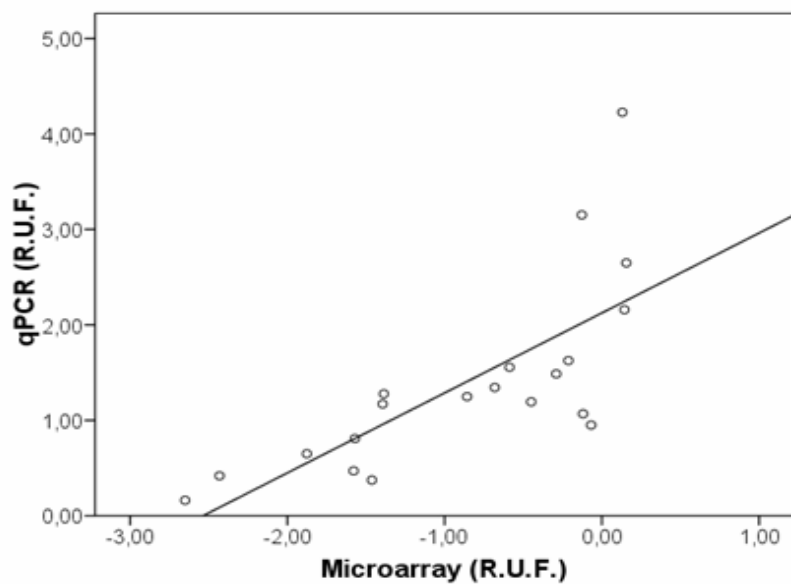

### HLA-DP $\alpha$ 1

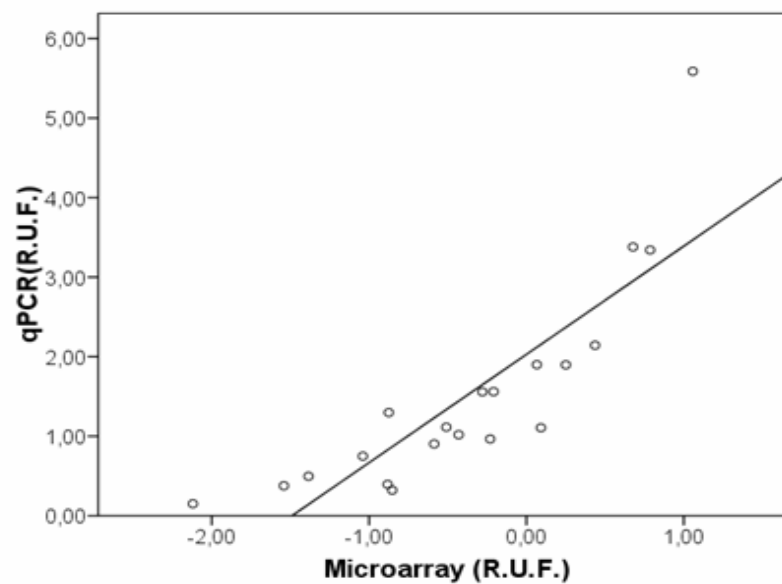

### CD8 $\alpha$

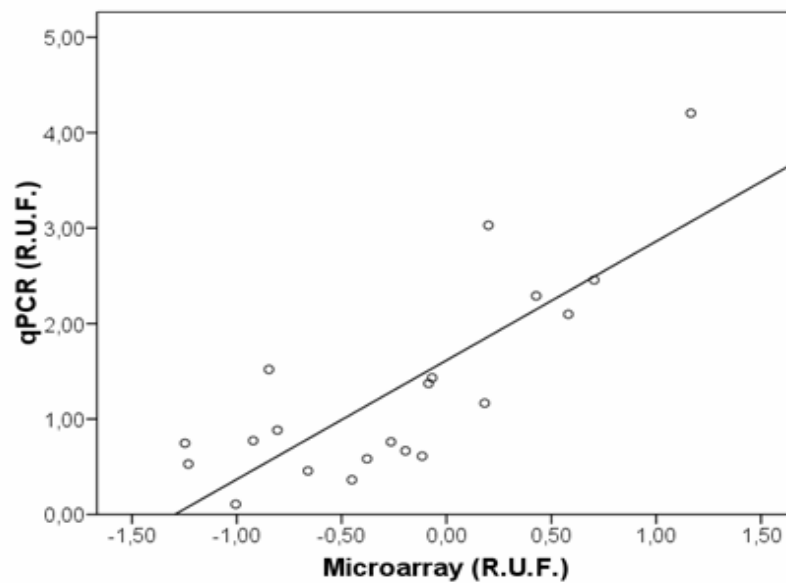

Supplement: MOESM2 [file 9732494]
